# Supplementary material
Source: MDPI journal article supplement (https://www.mdpi.com/2073-4395/7/1/3)
Supplement: s1 [file s1]

**Table S1.** Description of testing sites based on data from the Utah Climate Center (https://climate.usurf.usu.edu/) and the PRISM Climate Group (http://www.prism.oregonstate.edu/).

| **Site** | **Geographic coordinates** | **Elev.**  **(m)** | **Annual**  **precip.**  **(cm)** | **Winter**  **precip.**  **(cm)** | **Spring**  **precip.**  **(cm)** | **Summer**  **precip.**  **(cm)** | **Fall**  **precip.**  **(cm)** | **Avg. days above 0° C (range)** |
| --- | --- | --- | --- | --- | --- | --- | --- | --- |
| Fruita, Colorado | 39°10’55” N 108°41’56” W | 1403 | 24.6 | 4.8 | 6.3 | 5.3 | 8.2 | 181  (137 – 231) |
| Tetonia, Idaho | 43°53’06” N 111°17’00” W | 1876 | 47.6 | 13.4 | 13.6 | 9.7 | 10.9 | 68  (21 – 102) |
| Hyde Park, Utah | 41°48’41” N 111°49’28” W | 1378 | 48.7 | 11.9 | 15.4 | 7.4 | 12.3 | 123  (95 – 165) |
| Providence, Utah | 41°41’40” N 111°49’52” W | 1384 | 48.6 | 11.9 | 15.5 | 7.3 | 12.3 | 125  (82 – 178) |
| Richmond, Utah | 41°53’21” N 111°49’47” W | 1375 | 46.8 | 11.8 | 15.3 | 7.5 | 12.3 | 128  (63 – 183) |
| Tintic,  Utah | 39°54’12” N 112°08’52” W | 1795 | 40.2 | 10.3 | 11.9 | 7.7 | 10.3 | 132  (87 – 193) |
